# Supplementary material
Source: Springer Nature journal article supplement (https://www.springermedizin.de/resource/supplementary/12967_2012_1249_MOESM2_ESM.pdf/9573332)
Supplement: MOESM2 [file 9573332]

**Additional File 1. Summary of the Urinary Microbiome**

| Subject | Bladder    |          | # of sequences | # of OTUs | Inv Simpson         | Chao                    | Shannon           | Shannon Evenness | Coverage |
|---------|------------|----------|----------------|-----------|---------------------|-------------------------|-------------------|------------------|----------|
|         | Management | Distance |                |           |                     |                         |                   |                  |          |
| S01     | HC         | 0.03     | 3360           | 33        | 2.07 (1.99, 2.15)   | 50.5 (38.12, 92.84)     | 1.2 (1.16, 1.25)  | 0.34             | 99.55%   |
| S02     | HC         | 0.03     | 3331           | 57        | 2.96 (2.85, 3.09)   | 112.2 (75.81, 218.98)   | 1.68 (1.62, 1.73) | 0.41             | 99.28%   |
| S03     | HC         | 0.03     | 3310           | 37        | 3.21 (3.12, 3.31)   | 97 (53.65, 253.17)      | 1.46 (1.42, 1.5)  | 0.41             | 99.52%   |
| S04     | HC         | 0.03     | 3472           | 20        | 3.04 (2.97, 3.12)   | 38.33 (24.48, 95.08)    | 1.28 (1.25, 1.3)  | 0.43             | 99.68%   |
| S05     | HC         | 0.03     | 1931           | 46        | 4.51 (4.31, 4.72)   | 54.27 (48.35, 75.16)    | 1.95 (1.89, 2.01) | 0.51             | 99.28%   |
| S06     | HC         | 0.03     | 3007           | 128       | 5.47 (5.14, 5.84)   | 239.24 (184.07, 348.67) | 2.62 (2.56, 2.69) | 0.54             | 97.94%   |
| S07     | HC         | 0.03     | 3412           | 59        | 6.66 (6.37, 6.97)   | 109.14 (77.47, 195.09)  | 2.32 (2.27, 2.36) | 0.57             | 99.21%   |
| S08     | HC         | 0.03     | 3464           | 22        | 2.51 (2.43, 2.6)    | 29 (23.45, 55.75)       | 1.2 (1.17, 1.24)  | 0.39             | 99.77%   |
| S09     | HC         | 0.03     | 3494           | 26        | 1.55 (1.51, 1.6)    | 45.5 (31.22, 98.91)     | 0.77 (0.73, 0.81) | 0.24             | 99.63%   |
| S10     | HC         | 0.03     | 3531           | 5         | 1.41 (1.38, 1.45)   | 5 (5, 5)                | 0.58 (0.54, 0.61) | 0.36             | 100.00%  |
| S11     | HC         | 0.03     | 3499           | 26        | 1.8 (1.75, 1.85)    | 33.2 (27.6, 58.37)      | 0.88 (0.84, 0.92) | 0.27             | 99.74%   |
| S13     | HC         | 0.03     | 3068           | 54        | 3.15 (2.99, 3.32)   | 101.25 (71.88, 178.88)  | 1.73 (1.68, 1.78) | 0.43             | 99.09%   |
| S14     | HC         | 0.03     | 3374           | 66        | 2.2 (2.13, 2.27)    | 104.75 (81.73, 161.45)  | 1.21 (1.16, 1.26) | 0.29             | 99.08%   |
| S15     | HC         | 0.03     | 2628           | 94        | 6.4 (6.06, 6.78)    | 176.5 (131.21, 276.92)  | 2.47 (2.41, 2.53) | 0.54             | 98.29%   |
| S16     | HC         | 0.03     | 3476           | 27        | 2.99 (2.92, 3.07)   | 67 (38.32, 168.36)      | 1.29 (1.26, 1.32) | 0.39             | 99.54%   |
| S17     | HC         | 0.03     | 3490           | 23        | 1.75 (1.7, 1.81)    | 32 (25, 63.45)          | 0.9 (0.85, 0.94)  | 0.29             | 99.74%   |
| S18     | HC         | 0.03     | 2435           | 25        | 2.74 (2.66, 2.82)   | 36 (27.74, 69.1)        | 1.25 (1.21, 1.29) | 0.39             | 99.55%   |
| S19     | HC         | 0.03     | 3176           | 64        | 4.28 (4.11, 4.46)   | 77.57 (68.63, 103.75)   | 1.91 (1.86, 1.96) | 0.46             | 99.37%   |
| S20     | HC         | 0.03     | 3461           | 44        | 3.63 (3.48, 3.78)   | 51.8 (46.13, 72.61)     | 1.79 (1.74, 1.83) | 0.47             | 99.62%   |
| S21     | HC         | 0.03     | 3488           | 21        | 1.72 (1.67, 1.77)   | 30 (23, 61.45)          | 0.82 (0.78, 0.86) | 0.27             | 99.74%   |
| S22     | HC         | 0.03     | 3460           | 54        | 1.91 (1.83, 1.99)   | 65.14 (57.06, 94.63)    | 1.41 (1.35, 1.48) | 0.35             | 99.62%   |
| S23     | HC         | 0.03     | 3489           | 42        | 2.52 (2.46, 2.58)   | 63.08 (49.66, 100.02)   | 1.11 (1.08, 1.15) | 0.30             | 99.34%   |
| S24     | HC         | 0.03     | 3209           | 80        | 7.51 (7.13, 7.93)   | 105.09 (89.24, 148.12)  | 2.65 (2.59, 2.7)  | 0.60             | 99.25%   |
| S25     | HC         | 0.03     | 3403           | 86        | 3.25 (3.11, 3.4)    | 113.08 (96.33, 156.98)  | 1.93 (1.87, 1.99) | 0.43             | 99.24%   |
| S26     | HC         | 0.03     | 3345           | 73        | 6.75 (6.37, 7.18)   | 78 (74.22, 93.57)       | 2.61 (2.56, 2.66) | 0.61             | 99.67%   |
| S27     | Void       | 0.03     | 2757           | 236       | 13.9 (12.77, 15.24) | 458.68 (369.79, 606.62) | 3.73 (3.66, 3.8)  | 0.68             | 95.72%   |
| S28     | Void       | 0.03     | 3505           | 8         | 2.02 (1.95, 2.09)   | 8 (8, 0)                | 1.01 (0.98, 1.05) | 0.49             | 99.97%   |
| S29     | Void       | 0.03     | 3493           | 7         | 1.1 (1.09, 1.12)    | 10 (7.36, 31.78)        | 0.23 (0.2, 0.26)  | 0.12             | 99.91%   |
| S30     | Void       | 0.03     | 3176           | 60        | 6.03 (5.8, 6.27)    | 88.11 (70.06, 138.54)   | 2.19 (2.14, 2.23) | 0.53             | 99.28%   |
| S31     | Void       | 0.03     | 3334           | 25        | 3.34 (3.24, 3.44)   | 38.75 (28.4, 80.55)     | 1.45 (1.42, 1.49) | 0.45             | 99.67%   |
| S32     | Void       | 0.03     | 3502           | 8         | 1.83 (1.78, 1.9)    | 8 (8, 8)                | 0.95 (0.91, 0.99) | 0.46             | 100.00%  |
| S33     | Void       | 0.03     | 3436           | 7         | 1.53 (1.49, 1.57)   | 8 (7.07, 20.79)         | 0.63 (0.6, 0.66)  | 0.33             | 99.94%   |
| S34     | Void       | 0.03     | 3401           | 58        | 5.75 (5.62, 5.88)   | 109.67 (78.42, 188.73)  | 1.95 (1.91, 1.98) | 0.48             | 99.09%   |
| S35     | IC         | 0.03     | 3241           | 100       | 10.34 (9.84, 10.9)  | 117.65 (106.68, 146.64) | 2.93 (2.88, 2.98) | 0.64             | 99.23%   |
| S36     | IC         | 0.03     | 3463           | 10        | 1.98 (1.91, 2.05)   | 11 (10.09, 20.68)       | 0.97 (0.94, 1.01) | 0.42             | 99.91%   |
| S37     | IC         | 0.03     | 3297           | 75        | 5.03 (4.75, 5.35)   | 90.3 (79.96, 122.16)    | 2.39 (2.34, 2.45) | 0.55             | 99.45%   |
| S38     | IC         | 0.03     | 2589           | 55        | 2.43 (2.33, 2.54)   | 87.5 (67.26, 141.17)    | 1.42 (1.36, 1.48) | 0.36             | 99.00%   |
| S39     | IC         | 0.03     | 3496           | 11        | 1.15 (1.14, 1.18)   | 12.5 (11.15, 26.08)     | 0.34 (0.31, 0.38) | 0.14             | 99.91%   |
| S40     | IC         | 0.03     | 3412           | 14        | 2.5 (2.42, 2.59)    | 14 (14, 14)             | 1.23 (1.2, 1.27)  | 0.47             | 100.00%  |
| S41     | IC         | 0.03     | 3105           | 90        | 8.23 (7.87, 8.63)   | 138.46 (110.75, 203.18) | 2.63 (2.58, 2.68) | 0.58             | 98.84%   |
| S42     | IC         | 0.03     | 3464           | 8         | 1.03 (1.02, 1.04)   | 8 (8, 0)                | 0.09 (0.07, 0.11) | 0.04             | 99.97%   |
| S43     | FC         | 0.03     | 3368           | 27        | 1.26 (1.23, 1.29)   | 33 (28.33, 54.1)        | 0.6 (0.55, 0.65)  | 0.18             | 99.73%   |
| S44     | FC         | 0.03     | 3440           | 13        | 2.36 (2.27, 2.46)   | 13.33 (13.02, 18.96)    | 1.26 (1.23, 1.3)  | 0.49             | 99.94%   |
| S45     | FC         | 0.03     | 3175           | 53        | 5.23 (4.99, 5.5)    | 80.2 (61.26, 142.53)    | 2.17 (2.12, 2.21) | 0.55             | 99.46%   |
| S46     | FC         | 0.03     | 3487           | 11        | 2.88 (2.79, 2.97)   | 14 (11.39, 34)          | 1.25 (1.22, 1.27) | 0.52             | 99.89%   |
| S47     | FC         | 0.03     | 3201           | 27        | 5.65 (5.41, 5.92)   | 42 (30.25, 96.26)       | 2.1 (2.07, 2.14)  | 0.64             | 99.81%   |
| S48     | FC         | 0.03     | 3420           | 8         | 1.09 (1.07, 1.1)    | 8.5 (8.03, 16.26)       | 0.22 (0.19, 0.24) | 0.10             | 99.94%   |
| S49     | FC         | 0.03     | 3274           | 19        | 1.83 (1.77, 1.89)   | 20.2 (19.14, 29.37)     | 0.97 (0.93, 1.02) | 0.33             | 99.88%   |
| S50     | FC         | 0.03     | 3140           | 38        | 5.57 (5.35, 5.8)    | 43.25 (39, 65.61)       | 2.12 (2.07, 2.16) | 0.58             | 99.78%   |
| S51     | FC         | 0.03     | 2377           | 49        | 3.35 (3.18, 3.53)   | 199 (95.81, 529.69)     | 1.74 (1.68, 1.8)  | 0.45             | 98.95%   |
| S52     | FC         | 0.03     | 3422           | 22        | 1.65 (1.6, 1.7)     | 27.6 (23.16, 49.14)     | 0.9 (0.86, 0.95)  | 0.29             | 99.77%   |
| S53     | FC         | 0.03     | 3212           | 26        | 2.29 (2.23, 2.36)   | 35 (28, 66.45)          | 1.16 (1.11, 1.2)  | 0.35             | 99.72%   |

HC: Healthy Control, IC: Intermittent Catheter, FC: Foley Catheter
